# Supplementary material for: Transposable Elements Shape the Genome Diversity and the Evolution of Noctuidae Species
Source: Preprints.org preprint supplement (doi:10.20944/preprints202305.0213.v1), 2023-05-04
Supplement: Supplementary file 1 [file supplementary]

## Sheet: S1
Table S1 Species for comparative analysis of TEs in noctuid genomes
Species	Download links
Trichoplusia ni	https://www.ncbi.nlm.nih.gov/genome/18285?genome_assembly_id=408303
Busseola fusca	https://www.ncbi.nlm.nih.gov/genome/83360?genome_assembly_id=650124
Agrotis ipsilon	https://www.ncbi.nlm.nih.gov/genome/15346?genome_assembly_id=448981
Mamestra configurata	https://www.ncbi.nlm.nih.gov/genome/55480?genome_assembly_id=649357
Heliothis virescens	https://www.ncbi.nlm.nih.gov/genome/10938?genome_assembly_id=1799079
Helicoverpa armigera	https://www.ncbi.nlm.nih.gov/assembly/GCA_002156985.1
Helicoverpa zea	https://www.ncbi.nlm.nih.gov/assembly/GCA_002150865.1
Spodoptera exigua	https://www.ncbi.nlm.nih.gov/assembly/GCA_011316535.1
Spodoptera litura	https://www.ncbi.nlm.nih.gov/genome/14271?genome_assembly_id=350050
Spodoptera frugiperda	https://www.ncbi.nlm.nih.gov/assembly/GCA_011064685.1
Mesobuthus martensii	http://artedb.net/cgi-bin/download.php?f=Mesobuthus_martensii.masked.fasta
Tetranychus urticae	http://artedb.net/cgi-bin/download.php?f=Tetranychus_urticae.masked.fasta
Drosophila melanogaster	http://artedb.net/cgi-bin/download.php?f=Drosophila_melanogaster.masked.fasta
Apis cerana	http://artedb.net/cgi-bin/download.php?f=Apis_cerana.masked.fasta
Apis mellifera	http://artedb.net/cgi-bin/download.php?f=Apis_mellifera.masked.fasta
Bombus terrestris	http://artedb.net/cgi-bin/download.php?f=Bombus_terrestris.masked.fasta
Bombyx mori	http://artedb.net/cgi-bin/download.php?f=Bombyx_mori.masked.fasta
Melitaea cinxia	http://artedb.net/cgi-bin/download.php?f=Melitaea_cinxia.masked.fasta
Papilio xuthus	http://artedb.net/cgi-bin/download.php?f=Papilio_xuthus.masked.fasta
Acyrthosiphon pisum	http://artedb.net/cgi-bin/download.php?f=Acyrthosiphon_pisum.masked.fasta
Nilaparvata lugens	http://artedb.net/cgi-bin/download.php?f=Nilaparvata_lugens.masked.fasta

## Sheet: S2
Table S2 The value of AICc using 4 comparative models
Trait	BM	OU	EB	white
DNA	50.1824	54.8272	54.9824	52.684
LTR	29.8232	33.0941	34.6232	31.2244
LINE	57.3063	62.1063	60.9518	63.3345
SINE	38.1284	41.0039	42.9284	36.6384
DNA/CMC	-8.17221	-6.74128	-3.37221	-11.7281
DNA/Harbinger	-20.1281	-16.1286	-15.3281	-18.5762
DNA/MULE	-17.751	-18.5857	-12.951	-27.3345
DNA/PiggyBac	-14.5388	-9.94522	-9.73876	-12.0254
DNA/TcMar	3.12266	7.92266	7.30462	8.5387
DNA/hAT	2.18012	6.98012	3.11188	7.65275
DNA/Helitron	19.5455	22.4389	24.3455	18.5101
SINE/tRNA	24.5659	28.4361	29.3659	25.5477
LINE/CR1	41.9167	46.7167	46.3743	47.9662
LINE/CRE	-1.84939	2.098	2.95061	-1.41754
LINE/Dong	-9.41773	-4.71542	-4.61773	-6.51427
LINE/Jockey	-16.681	-13.9067	-11.881	-16.5631
LINE/L2	26.5372	31.1512	31.3372	30.0465
LINE/Proto2	0.228417	4.13217	5.02842	0.95142
LINE/R1	36.6172	41.4172	36.865	42.3087
LINE/RTE	25.5767	30.3767	28.3743	30.5301
LTR/Gypsy	24.2293	26.7463	29.0293	22.9813
LTR/Pao	-1.60056	2.54653	3.19944	0.289859

## Sheet: S3
Table S3 TE consensus libraries in the ten Noctuidae species
species		original	filtered1(remove non-TE protein)	filtered2(remove rna,simple repeat)	teclass
Agrotis_ipsilon	DNA	185	185	185	1009
	LINE	447	446	446	637
	LTR	59	59	59	256
	RC	112	111	111	111
	Retro	0	0	0	230
	SINE	48	48	48	95
	Satellite	4	4	0	0
	Simple_repeat	7	5	0	0
	Unknown	1670	1640	1640	131
	nonLTR	0	0	0	20
	tRNA	9	9	0	0
	Totall	2541	2507	2489	2489
Busseola_fusca	DNA	213	213	213	956
	LINE	517	517	517	831
	LTR	57	57	57	364
	RC	114	111	111	111
	Retro	0	0	0	282
	SINE	29	29	29	103
	Satellite	1	1	0	0
	Simple_repeat	10	8	0	0
	Unknown	1962	1893	1893	136
	nonLTR	0	0	0	37
	tRNA	1	1	0	0
	Totall	2904	2830	2820	2820
Helicoverpa_armigera	DNA	73	73	73	508
	LINE	193	193	193	285
	LTR	15	15	15	105
	RC	100	99	99	99
	Retro	0	0	0	104
	SINE	33	33	33	59
	Satellite	1	1	0	0
	Simple_repeat	2	1	0	0
	Unknown	828	808	808	52
	nonLTR	0	0	0	9
	rRNA	1	1	0	0
	tRNA	2	2	0	0
	Totall	1248	1226	1221	1221
Helicoverpa_zea	DNA	101	101	101	529
	LINE	232	232	232	332
	LTR	9	9	9	116
	RC	108	108	108	108
	Retro	0	0	0	98
	SINE	40	40	40	75
	Simple_repeat	5	5	0	0
	Unknown	862	852	852	67
	nonLTR	0	0	0	17
	rRNA	1	1	0	0
	snRNA	1	1	0	0
	Totall	1359	1349	1342	1342
Heliothis_virescens	DNA	164	164	164	690
	LINE	259	259	259	405
	LTR	43	43	43	147
	RC	165	165	165	165
	Retro	0	0	0	133
	SINE	55	55	55	94
	Satellite	3	3	0	0
	Simple_repeat	7	6	0	0
	Unknown	1061	1044	1044	85
	nonLTR	0	0	0	11
	tRNA	2	2	0	0
	Totall	1759	1741	1730	1730
Mamestra_configurata	DNA	230	230	230	1066
	LINE	517	517	517	845
	LTR	44	44	44	278
	RC	120	120	120	120
	Retro	0	0	0	271
	SINE	19	19	19	87
	Satellite	3	3	0	0
	Simple_repeat	7	4	0	0
	Unknown	1949	1896	1896	131
	nonLTR	0	0	0	28
	rRNA	1	1	0	0
	tRNA	1	1	0	0
	Totall	2891	2835	2826	2826
Spodoptera_exigua	DNA	97	97	97	345
	LINE	358	357	357	488
	LTR	104	104	104	195
	RC	112	111	111	111
	Retro	0	0	0	98
	SINE	31	31	31	42
	Simple_repeat	2	1	0	0
	Unknown	640	630	630	43
	nonLTR	0	0	0	8
	rRNA	2	2	0	0
	Totall	1346	1333	1330	1330
Spodoptera_frugiperda	DNA	132	130	130	538
	LINE	271	271	271	403
	LTR	60	60	60	162
	RC	107	106	106	106
	Retro	0	0	0	121
	SINE	10	10	10	46
	Satellite	3	3	0	0
	Simple_repeat	2	2	0	0
	Unknown	888	873	873	63
	nonLTR	0	0	0	11
	rRNA	1	1	0	0
	snRNA	1	1	0	0
	Totall	1475	1457	1450	1450
Spodoptera_litura	DNA	123	122	122	456
	LINE	356	356	356	597
	LTR	41	41	41	190
	RC	100	100	100	100
	Retro	0	0	0	150
	Retroposon	1	1	1	1
	SINE	26	26	26	59
	Satellite	1	1	0	0
	Simple_repeat	2	2	0	0
	Unknown	1005	987	987	70
	nonLTR	0	0	0	10
	tRNA	1	1	0	0
	Totall	1656	1637	1633	1633
Trichoplusia_ni	DNA	71	71	71	304
	LINE	239	239	239	306
	LTR	59	59	59	146
	RC	124	124	124	124
	Retro	0	0	0	68
	SINE	38	38	38	57
	Simple_repeat	3	2	0	0
	Unknown	522	507	507	32
	nonLTR	0	0	0	1
	rRNA	2	2	0	0
	snRNA	2	2	0	0
	tRNA	6	6	0	0
	Totall	1066	1050	1038	1038

## Sheet: S4
Table S4 Cutoffs of dS
Species pairs	Threshold(Bottom 2.5%)
Agrotis_ipsilon-Helicoverpa_armigera	0.429
Agrotis_ipsilon-Helicoverpa_zea	0.4267
Agrotis_ipsilon-Mamestra_configurata	0.2985
Agrotis_ipsilon-Spodoptera_exigua	0.5108
Busseola_fusca-Heliothis_virescens	0.3981
Busseola_fusca-Spodoptera_exigua	0.4682
Helicoverpa_armigera-Mamestra_configurata	0.417
Helicoverpa_armigera-Spodoptera_exigua	0.5119
Helicoverpa_armigera-Spodoptera_frugiperda	0.4803
Helicoverpa_armigera-Spodoptera_litura	0.5056
Helicoverpa_armigera-Trichoplusia_ni	0.5776
Helicoverpa_zea-Mamestra_configurata	0.4154
Helicoverpa_zea-Spodoptera_exigua	0.5161
Helicoverpa_zea-Spodoptera_frugiperda	0.4792
Helicoverpa_zea-Spodoptera_litura	0.4961
Helicoverpa_zea-Trichoplusia_ni	0.5834
Heliothis_virescens-Mamestra_configurata	0.4255
Heliothis_virescens-Spodoptera_exigua	0.5216
Heliothis_virescens-Trichoplusia_ni	0.5825
Mamestra_configurata-Spodoptera_exigua	0.5147
Mamestra_configurata-Spodoptera_frugiperda	0.4665
Mamestra_configurata-Spodoptera_litura	0.4962
Mamestra_configurata-Trichoplusia_ni	0.5796
Spodoptera_exigua-Spodoptera_litura	0.1709
Spodoptera_exigua-Trichoplusia_ni	0.6635
Spodoptera_frugiperda-Trichoplusia_ni	0.6257
Spodoptera_litura-Trichoplusia_ni	0.6601

## Sheet: S5
Table S5 horizontal transfer of TE
Species1	Seq1	Species2	Seq2	Family	dS
Agrotis ipsilon	PNFC01003582.1(260589..261749)	Helicoverpa armigera	NW_018395664.1c(79774..80714)	LINE/RTE-RTE	0.1321
Agrotis ipsilon	PNFC01006573.1(858604..860382)	Helicoverpa armigera	NW_018395428.1c(1601570..1603451)	LINE/L2	0.2852
Agrotis ipsilon	PNFC01007584.1c(619146..620940)	Helicoverpa zea	KZ118526.1(116213..117544)	LINE/RTE-RTE	0.1137
Agrotis ipsilon	PNFC01006573.1(858604..860382)	Helicoverpa zea	KZ118816.1c(141224..143766)	LINE/L2	0.2715
Agrotis ipsilon	PNFC01003776.1c(1456940..1459744)	Mamestra configurata	NDFZ01002736.1c(12731..14831)	LINE/CR1	0.1579
Agrotis ipsilon	PNFC01006573.1(858604..860382)	Spodoptera exigua	CM022060.1(2157537..2159523)	LINE/L2	0.3167
Busseola fusca	VKGM01025024.1c(2113..3993)	Heliothis virescens	NWSH01000981.1c(42578..45307)	DNA/RC	0.3465
Busseola fusca	VKGM01014538.1(4341..6547)	Spodoptera exigua	CM022066.1(13310614..13310727,13310960..13313926)	LINE/Dong-R4	0.4517
Busseola fusca	VKGM01004504.1c(2753..3946)	Spodoptera exigua	CM022065.1(7535190..7536219)	DNA/TcMar-Mariner	0.0771
Busseola fusca	VKGM01039698.1c(1596..3252)	Spodoptera exigua	CM022071.1c(12766295..12767885)	LINE/CR1-Zenon	0.3756
Busseola fusca	VKGM01014577.1c(3787..5983)	Spodoptera exigua	CM022073.1(4232644..4235370)	LINE/Dong-R4	0.4523
Helicoverpa armigera	NW_018395452.1(742457..742775,742854..743913)	Mamestra configurata	NDFZ01084186.1(837..2468)	DNA/TcMar-Tc1	0.039
Helicoverpa armigera	NW_018395436.1c(106263..107824)	Mamestra configurata	NDFZ01005486.1(49020..50523)	DNA/TcMar-Tc1	0.1155
Helicoverpa armigera	NW_018395428.1c(1601570..1603451)	Spodoptera exigua	CM022060.1(2157537..2159523)	LINE/L2	0.0841
Helicoverpa armigera	NW_018395447.1c(685121..686985)	Spodoptera exigua	CM022047.1(14983020..14985308)	LINE/RTE-RTE	0.3336
Helicoverpa armigera	NW_018396005.1(52030..55174)	Spodoptera exigua	CM022066.1(1324460..1328045)	LINE/CR1	0.2577
Helicoverpa armigera	NW_018395436.1c(106263..107824)	Spodoptera frugiperda	NC_049718.1c(12038563..12040119)	DNA/TcMar-Tc1	0.1834
Helicoverpa armigera	NW_018395452.1(742457..742775,742854..743913)	Spodoptera litura	NC_036206.1c(2131763..2132046,2132105..2133240)	DNA/TcMar-Tc1	0.1079
Helicoverpa armigera	NW_018395447.1c(685121..686985)	Trichoplusia ni	NC_039480.1(10805180..10808007)	LINE/RTE-RTE	0.0704
Helicoverpa armigera	NW_018395705.1c(221766..226587)	Trichoplusia ni	NC_039486.1(9668645..9671197)	LINE/L2	0.4105
Helicoverpa zea	KZ118643.1(803010..804568)	Mamestra configurata	NDFZ01005486.1(49020..50523)	DNA/TcMar-Tc1	0.1048
Helicoverpa zea	KZ116554.1c(49463..51095)	Mamestra configurata	NDFZ01084186.1(837..2468)	DNA/TcMar-Tc1	0.0409
Helicoverpa zea	KZ118816.1c(141224..143766)	Spodoptera exigua	CM022053.1c(9151143..9154736)	LINE/L2	0.3005
Helicoverpa zea	KZ118592.1c(34487..35452)	Spodoptera exigua	CM022047.1(14983020..14985308)	LINE/RTE-RTE	0.337
Helicoverpa zea	KZ118201.1(102597..104154)	Spodoptera frugiperda	NC_049718.1c(12038563..12040119)	DNA/TcMar-Tc1	0.1749
Helicoverpa zea	KZ116554.1c(49463..51095)	Spodoptera litura	NC_036206.1c(2131763..2132046,2132105..2133240)	DNA/TcMar-Tc1	0.1122
Helicoverpa zea	KZ118148.1c(149129..150677)	Trichoplusia ni	NC_039484.1c(7798018..7801544)	LINE/RTE-BovB	0.2256
Helicoverpa zea	KZ118226.1c(174516..175612)	Trichoplusia ni	NC_039480.1(10805180..10808007)	LINE/RTE-RTE	0.0903
Heliothis virescens	NWSH01001767.1c(39140..40312)	Mamestra configurata	NDFZ01005354.1(67077..69253)	LINE/R1	0.4153
Heliothis virescens	NWSH01000405.1(75536..76179,76182..77390)	Mamestra configurata	NDFZ01000078.1(7302..8575)	DNA/TcMar-Mariner	0.2279
Heliothis virescens	NWSH01000405.1(75536..76179,76182..77390)	Spodoptera exigua	CM022078.1c(2524009..2525342)	DNA/TcMar-Mariner	0.1313
Heliothis virescens	NWSH01000404.1c(34255..35819,35845..36723)	Spodoptera exigua	CM022066.1(1324460..1328045)	LINE/CR1	0.3975
Heliothis virescens	NWSH01000874.1(31042..32497)	Trichoplusia ni	NC_039479.1(20163177..20166461)	LINE/RTE-BovB	0.5312
Mamestra configurata	NDFZ01003589.1(9433..14396)	Spodoptera exigua	CM022056.1(6279221..6282317)	LTR/Gypsy	0.0955
Mamestra configurata	NDFZ01000519.1(2560..3691)	Spodoptera exigua	CM022072.1c(664952..666205)	LINE/RTE-BovB	0.3804
Mamestra configurata	NDFZ01000078.1(7302..8575)	Spodoptera exigua	CM022074.1(2445263..2446589)	DNA/TcMar-Mariner	0.2743
Mamestra configurata	NDFZ01005383.1c(298541..300122)	Spodoptera exigua	CM022060.1(13749735..13753339)	LINE/CR1	0.3934
Mamestra configurata	NDFZ01005061.1c(101535..104259)	Spodoptera exigua	CM022065.1c(576548..579593)	LINE/Dong-R4	0.3779
Mamestra configurata	NDFZ01005486.1(49020..50523)	Spodoptera frugiperda	NC_049718.1c(12038563..12040119)	DNA/TcMar-Tc1	0.1662
Mamestra configurata	NDFZ01005485.1(590711..594425)	Spodoptera frugiperda	NC_049729.1c(13244199..13248051)	DNA/Zator	0
Mamestra configurata	NDFZ01084186.1(837..2468)	Spodoptera litura	NC_036206.1c(2131763..2132046,2132105..2133240)	DNA/TcMar-Tc1	0.0654
Mamestra configurata	NDFZ01005486.1(1019746..1021378)	Spodoptera litura	NC_036187.1c(4529583..4531210)	DNA/TcMar-Tc1	0.0397
Mamestra configurata	NDFZ01005003.1(129064..131283)	Trichoplusia ni	NW_020800470.1c(40140..43263)	LINE/RTE-RTE	0.4261
Spodoptera frugiperda	NC_049711.1c(12031114..12031160,12031214..12032998)	Trichoplusia ni	NC_039479.1c(6687115..6688996)	LINE/Proto2	0.3647
Mamestra configurata	NDFZ01005215.1c(283940..285580)	Trichoplusia ni	NW_020800226.1(7876..9327)	DNA/TcMar-Tc1	0.0256
Spodoptera exigua	CM022068.1(13237170..13238793,13239261..13239554)	Spodoptera litura	NC_036192.1(11198648..11200207)	LINE/RTE-RTE	0.1317
Spodoptera exigua	CM022058.1(1287465..1288753)	Spodoptera litura	NC_036203.1c(8016288..8017583)	DNA/TcMar-Mariner	0.1191
Spodoptera exigua	CM022053.1(6714962..6717122)	Spodoptera litura	NC_036217.1c(2968194..2970731)	LINE/RTE-BovB	0.1655
Spodoptera exigua	CM022061.1(14039879..14043008)	Spodoptera litura	NC_036198.1(1131585..1133175)	LINE/RTE-RTE	0.1574
Spodoptera exigua	CM022049.1c(7447060..7459696)	Trichoplusia ni	NC_039502.1c(4668736..4674243)	DNA/Maverick	0.1134
Spodoptera exigua	CM022073.1(5241828..5256655)	Trichoplusia ni	NW_020800385.1(23636..28582)	DNA/Maverick	0.0808
Spodoptera exigua	CM022075.1(14201947..14204322)	Trichoplusia ni	NC_039480.1(10805180..10808007)	LINE/RTE-RTE	0.3299
Spodoptera exigua	CM022078.1(1424355..1428503)	Trichoplusia ni	NC_039505.1(137719..138210,139593..143018)	DNA/Maverick	0.1739
Spodoptera exigua	CM022071.1(4101810..4105334,4108665..4112994)	Trichoplusia ni	NW_020800558.1c(22762..25099)	LINE/R1	0.2784
Spodoptera exigua	CM022051.1(14808719..14811081)	Trichoplusia ni	NC_039499.1(4107542..4111945)	LTR/Copia	0.3003
Spodoptera litura	NC_036200.1(10198467..10200502)	Trichoplusia ni	NC_039483.1(17907467..17909783)	LINE/R1	0.392

## Sheet: S6
Table S6 Mininum numbers of transfer events of TE
copy1	copy2	q	s	sp1	sp2	consensus1	consensus2	pID	length	qStart	qEnd	sStart	sEnd	ka	ks	length.aa	community	hitGroup	independent	superfamily
VKGM01012943.1:3819:4285:+	AYEL01048205.1:53587:54117:+	2292	4812	Busseola_fusca	Mesobuthus_martensii	rnd-6_family-432	Mariner-7_MesMar	84.071	452	24	466	19	469	0.104347	0.349732	327	75	22	TRUE	Tc1/Mariner
VKGM01045684.1:1310:1966:+	AYEL01069896.1:94654:95223:+	2465	4858	Busseola_fusca	Mesobuthus_martensii	rnd-6_family-432	Mariner-7_MesMar	83.505	582	85	654	4	561	0.130003	0.276637	303	74	22	TRUE	Tc1/Mariner
VKGM01045684.1:1310:1966:+	AYEL01048890.1:19082:20203:+	2465	4813	Busseola_fusca	Mesobuthus_martensii	rnd-6_family-432	Mariner-7_MesMar	83.183	666	4	654	480	1112	0.0903957	0.286389	279	76	22	TRUE	Tc1/Mariner
VKGM01045684.1:1310:1966:+	AYEL01083438.1:166925:167452:+	2465	4775	Busseola_fusca	Mesobuthus_martensii	rnd-6_family-432	Mariner-7_MesMar	83.099	497	165	654	39	510	0.115548	0.336425	249	76	22	TRUE	Tc1/Mariner
VKGM01042585.1:994:1454:+	AYEL01069896.1:94654:95223:+	2452	4858	Busseola_fusca	Mesobuthus_martensii	rnd-6_family-432	Mariner-7_MesMar	82.998	447	2	441	82	523	0.118892	0.357205	396	74	22	TRUE	Tc1/Mariner
VKGM01045684.1:1310:1966:+	AYEL01090682.1:31013:32135:+	2465	4818	Busseola_fusca	Mesobuthus_martensii	rnd-6_family-432	Mariner-7_MesMar	81.325	664	4	654	479	1112	0.149713	0.17957	297	76	22	TRUE	Tc1/Mariner
VKGM01090815.1:670:1028:+	NW_003383722.1:358424:358893:+	2590	1	Busseola_fusca	Acyrthosiphon_pisum	rnd-6_family-2184	Helitron-6_AcyPis	99.112	338	22	359	1	338	0.00820612	0.0210117	336	1069	309	TRUE	Helitron
VKGM01090815.1:670:1028:+	NW_003383722.1:361977:362446:+	2590	2	Busseola_fusca	Acyrthosiphon_pisum	rnd-6_family-2184	Helitron-6_AcyPis	99.112	338	22	359	1	338	0.00820612	0.0210117	336	1070	309	TRUE	Helitron
NC_049734.1:3429626:3430933:+	NW_003383525.1:946422:947685:+	6061	18	Spodoptera_frugiperda	Acyrthosiphon_pisum	rnd-5_family-266	Helitron-6_AcyPis	89.317	1245	65	1308	1	1235	0.0486226	0.295908	1149	1122	309	TRUE	Helitron
NC_049734.1:3429626:3430933:+	NW_003383626.1:523962:524534:+	6061	15	Spodoptera_frugiperda	Acyrthosiphon_pisum	rnd-5_family-266	Helitron-6_AcyPis	88.95	543	766	1308	2	544	0.0584118	0.361274	543	1122	309	TRUE	Helitron
VKGM01041556.1:1785:3005:-	NW_003383493.1:561266:561652:+	2447	7	Busseola_fusca	Acyrthosiphon_pisum	rnd-5_family-580	Helitron-6_AcyPis	88.832	394	824	1217	1	387	0.0356841	0.322111	345	1068	309	TRUE	Helitron
CM022052.1:2737054:2737566:-	NW_003399807.1:1:440:+	5041	24	Spodoptera_exigua	Acyrthosiphon_pisum	rnd-1_family-385	Helitron-1_AP	88.491	391	124	513	1	390	0.052687	0.303442	390	1125	309	TRUE	Helitron
NC_036191.1:918631:919912:+	NW_003383493.1:561266:561652:+	6166	7	Spodoptera_litura	Acyrthosiphon_pisum	rnd-6_family-636	Helitron-6_AcyPis	88.325	394	826	1219	1	387	0.0356471	0.33631	345	1126	309	TRUE	Helitron
WNNL01000056.1:78886:79393:-	NW_003383493.1:561266:561652:+	5855	7	Spodoptera_exigua	Acyrthosiphon_pisum	rnd-1_family-385	Helitron-6_AcyPis	88.202	356	90	445	32	387	0.064053	0.331465	345	1126	309	TRUE	Helitron
VKGM01017650.1:1754:2115:+	NW_003383791.1:5448:6585:+	2333	11	Busseola_fusca	Acyrthosiphon_pisum	rnd-6_family-2184	Helitron-6_AcyPis	87.978	366	1	362	690	1052	0.072808	0.261478	270	1071	309	TRUE	Helitron
NC_049734.1:3429626:3430933:+	NW_003383791.1:5448:6585:+	6061	11	Spodoptera_frugiperda	Acyrthosiphon_pisum	rnd-5_family-266	Helitron-6_AcyPis	87.728	1149	145	1289	1	1138	0.0584976	0.283673	987	1122	309	TRUE	Helitron
NDFZ01004822.1:70606:70943:+	NW_003383792.1:267967:269106:+	3745	12	Mamestra_configurata	Acyrthosiphon_pisum	rnd-5_family-1896	Helitron-6_AcyPis	86.804	341	1	335	646	986	0.0712737	0.319885	330	1163	309	TRUE	Helitron
NDFZ01004665.1:32346:33238:+	NW_003383792.1:267967:269106:+	3650	12	Mamestra_configurata	Acyrthosiphon_pisum	rnd-5_family-1896	Helitron-6_AcyPis	81.736	887	23	893	97	965	0.136318	0.298723	807	1163	309	TRUE	Helitron
NC_049715.1:5911574:5912771:+	NW_003398136.1:228:634:+	5944	22	Spodoptera_frugiperda	Acyrthosiphon_pisum	rnd-5_family-266	Helitron-6_AcyPis	96.812	345	854	1198	1	345	0.0140866	0.0625216	339	1124	326	TRUE	Helitron
NC_049715.1:5911574:5912771:+	NW_003404517.1:1:485:+	5944	26	Spodoptera_frugiperda	Acyrthosiphon_pisum	rnd-5_family-266	Helitron-6_AcyPis	96.69	423	776	1198	1	423	0.01439	0.0727467	417	1124	326	TRUE	Helitron
NC_049715.1:5911574:5912771:+	NW_003402861.1:1:480:+	5944	25	Spodoptera_frugiperda	Acyrthosiphon_pisum	rnd-5_family-266	Helitron-6_AcyPis	96.651	418	781	1198	1	418	0.0145999	0.0738181	411	1124	326	TRUE	Helitron
NC_049715.1:5911574:5912771:+	NW_003394309.1:1:427:+	5944	21	Spodoptera_frugiperda	Acyrthosiphon_pisum	rnd-5_family-266	Helitron-6_AcyPis	96.438	365	834	1198	1	365	0.0212948	0.0583754	357	1124	326	TRUE	Helitron
NC_049715.1:5911574:5912771:+	NW_003385794.1:1:471:+	5944	8	Spodoptera_frugiperda	Acyrthosiphon_pisum	rnd-5_family-266	Helitron-6_AcyPis	96.333	409	790	1198	1	409	0.014904	0.0831467	402	1124	326	TRUE	Helitron
NC_049715.1:5911574:5912771:+	NW_003383920.1:139772:140232:+	5944	5	Spodoptera_frugiperda	Acyrthosiphon_pisum	rnd-5_family-266	Helitron-6_AcyPis	96.241	399	800	1198	1	399	0.0153165	0.0860688	393	1124	326	TRUE	Helitron
NC_049715.1:5911574:5912771:+	NW_003386876.1:15:625:+	5944	10	Spodoptera_frugiperda	Acyrthosiphon_pisum	rnd-5_family-266	Helitron-6_AcyPis	95.993	549	651	1198	1	549	0.0215145	0.0809437	501	1124	326	TRUE	Helitron
NC_049715.1:5911574:5912771:+	NW_003383768.1:926734:927268:+	5944	4	Spodoptera_frugiperda	Acyrthosiphon_pisum	rnd-5_family-266	Helitron-6_AcyPis	95.983	473	726	1198	1	473	0.023703	0.0804339	465	1124	326	TRUE	Helitron
NC_049715.1:5911574:5912771:+	NW_003406116.1:16:550:+	5944	27	Spodoptera_frugiperda	Acyrthosiphon_pisum	rnd-5_family-266	Helitron-6_AcyPis	95.983	473	726	1198	1	473	0.0250214	0.0793576	465	1124	326	TRUE	Helitron
NC_049715.1:5911574:5912771:+	NW_003383509.1:830564:831131:+	5944	16	Spodoptera_frugiperda	Acyrthosiphon_pisum	rnd-5_family-266	Helitron-6_AcyPis	95.85	506	695	1198	1	506	0.0199732	0.0837909	441	1124	326	TRUE	Helitron
CM022071.1:5282200:5284772:+	NW_003383792.1:267967:269106:+	5542	12	Spodoptera_exigua	Acyrthosiphon_pisum	rnd-6_family-250	Helitron-6_AcyPis	93.111	479	2095	2573	1	479	0.0449446	0.15177	471	1123	326	TRUE	Helitron
NC_049717.1:7569379:7570157:+	NW_003383792.1:267967:269106:+	5963	12	Spodoptera_frugiperda	Acyrthosiphon_pisum	rnd-5_family-266	Helitron-6_AcyPis	92.897	535	243	777	1	535	0.0503124	0.166969	534	1123	326	TRUE	Helitron
CM022060.1:3303621:3304629:+	NW_003383792.1:267967:269106:+	5249	12	Spodoptera_exigua	Acyrthosiphon_pisum	rnd-6_family-250	Helitron-6_AcyPis	91.17	487	523	1009	1	479	0.0543123	0.143736	474	1123	326	TRUE	Helitron
NC_049717.1:7569379:7570157:+	NW_003383732.1:158343:159474:+	5963	3	Spodoptera_frugiperda	Acyrthosiphon_pisum	rnd-5_family-266	Helitron-6_AcyPis	91.051	514	264	777	1	510	0.036619	0.203085	198	1123	326	TRUE	Helitron
CM022071.1:5282200:5284772:+	NW_003383732.1:158343:159474:+	5542	3	Spodoptera_exigua	Acyrthosiphon_pisum	rnd-6_family-250	Helitron-6_AcyPis	91.048	458	2116	2573	1	454	0.036619	0.192196	198	1123	326	TRUE	Helitron
CM022071.1:5281494:5281964:+	NW_003384513.1:56154:56542:+	5541	6	Spodoptera_exigua	Acyrthosiphon_pisum	rnd-1_family-369	Helitron-6_AcyPis	90.169	356	123	471	20	375	0.0596915	0.21786	342	1127	326	TRUE	Helitron
NC_036198.1:6076180:6078537:+	NW_003383732.1:158343:159474:+	6240	3	Spodoptera_litura	Acyrthosiphon_pisum	rnd-6_family-636	Helitron-6_AcyPis	89.064	823	1281	2099	18	836	0.0639774	0.233278	465	1123	326	TRUE	Helitron
NC_036198.1:6076180:6078537:+	NW_003383792.1:267967:269106:+	6240	12	Spodoptera_litura	Acyrthosiphon_pisum	rnd-6_family-636	Helitron-6_AcyPis	88.539	1143	1236	2356	1	1136	0.0578266	0.262286	1104	1123	326	TRUE	Helitron
CM022071.1:5284896:5285397:-	NW_003383792.1:267967:269106:+	5543	12	Spodoptera_exigua	Acyrthosiphon_pisum	rnd-1_family-395	Helitron-6_AcyPis	88.031	518	1	502	609	1126	0.0351624	0.35682	492	1123	326	TRUE	Helitron

## Sheet: S7
Table S7 Added species for lineage-specific analysis of TEs in noctuid genomes
Species	Molecule type	Update date	Number of sequences
Hyposmocoma kahamanoa	Genomic	44588	2929
Papilio Xuthus	Genomic	44588	5572
Papilio polytes	Genomic	44588	3874
Ostrinia furnacalis	Genomic	44588	7722
Maniola hyperantus	Genomic	44588	87
Zerene cesonia	Genomic	44588	275
Aricia agestis	Genomic	44588	25
Trichoplusia ni	Genomic	44588	1031
Manduca sexta	Genomic	44588	4057
Pieris rapae	Genomic	44588	40
Papilio machaon	Genomic	44588	33
Danaus plexippus	Genomic	44588	4115
Bicyclus anynana	Genomic	44588	10800
Bombyx mori	Genomic	44588	697
Amyelois transitella	Genomic	44588	7301
Pieris brassicae	Genomic	44588	401
Bombyx mandarina	Genomic	44588	3105
Colias croceus	Genomic	44588	32
Helicoverpa armigera	Genomic	44588	998
Spodoptera litura	Genomic	44588	2975
Maniola jurtina	Genomic	44588	31
Pararge aegeria	Genomic	44588	70
Galleria mellonella	Genomic	44588	13304
Melitaea cinxia	Genomic	44588	31
Plutella xylostella	Genomic	44588	574
Spodoptera frugiperda	Genomic	44588	92
Vanessa tameamea	Genomic	44588	1558
